# Supplementary material
Source: PubMed Central journal article supplement (PMC8384967)

### **Supplemental Figure 1. Siglec-6 expression in primary cells and cell lines**

**A)** *SIGLEC6* mRNA qPCR analysis in primary CD34<sup>+</sup>HSC cells, B and T-cells and the indicated cell lines. Each dot represents an independent data point. **B)** Flow cytometry analysis comparing Siglec-6 levels in the indicated cell lines. **C)** Table representing the percentage of Siglec-6<sup>+</sup> B-cells in different healthy subjects. **D)** Representative flow cytometry analysis of Siglec-6 levels in primary and relapsed CLL (CD5<sup>+</sup>CD19<sup>+</sup>) and T-cells (CD3<sup>+</sup>) from a donor used as reference.

### **Supplemental Figure 2. CAR-T cell proliferation in response to plate bound Siglec-6.**

Quantitation of CAR-T cell proliferation by CPD dilution after three days culture in multiwell plates coated with recombinant Siglec-6-Fc, showing the percentage of cells in each cycle. T-test analysis indicated no significant differences between JML1-CAR-short and JML1-CAR. Data corresponds to four independent experiments, n=4,.

### **Supplemental Figure 3. Cytotoxic activity of JML1-CAR and JML1-short-CAR T-cells against Siglec-6<sup>hi</sup> U937 cells.**

*In vitro* cytotoxic analysis after incubation of Siglec-6<sup>-</sup> internal negative cells CCRF-CEM (CPD<sup>+</sup>) and, Siglec-6<sup>hi</sup> U937 cells (CFSE<sup>+</sup>) with the indicated CAR-T cells for 4-6 hours at the indicated effector to target cell ratios. **B)** Quantitation of cytotoxicity at the indicated effector to target cell ratios in two independent experiments. Cytotoxic activity is derived as described in the Methods section. T-test of JML1-CAR vs JML1-short-CAR is shown, p<0.001 (\*\*\*), p<0.01 (\*\*) or p<0.05 (\*), n=4.

### **Supplemental Figure 4. Identification of the Siglec-6 domain that binds JML1.**

ELISA showing the binding of JML1 Fab to the indicated Siglec-6-ectodomains. Bottom: Cartoon representations of the Siglec-6 ectodomain constructs used in the ELISA and the expression cassette map. V = Ig-like V-type domain (membrane-distal), C = Ig-like C2-type domains I (middle) and II (membrane proximal). Data are representative of two independent experiments and were analyzed using GraphPad Prism software. Statistics were calculated using an unpaired Welch's t test (\*\*  $P \leq 0.01$ )

### **Supplemental Figure 5. Siglec-6 levels in primary CLL**

**A)** Surface Siglec-6 levels in primary CLL samples shown in Figure 5E, comparing Siglec-6 levels in CLL and T-cells from the same patient. **B)** quantitation of the percentage of Siglec-6+ remaining CLL cells after treatment with the indicated CARs as in Figure 5G. Lines represent a single CLL sample treated with either CAR. T-test  $p=0.0385$ ,  $n=6$ .

### **Supplemental Figure 6. JML1-CAR-short and JML1-CAR have antitumor activity in a xenograft mouse model of CLL**

**A)** Surface expression of Siglec-6 analyzed by flow cytometry in the indicated cell lines. **B)** Image of *in vivo* luminescence at different times after injection of the indicated cell lines. **C)** Quantitative analysis of luminescence observed in (B) at the indicated times. **D)** Image of *in vivo* luminescence at different times after injection of MEC1-002 cells and the indicated CAR-T cells. **E)** Quantitative analysis of luminescence observed in (D) at the indicated times. Average radiance corresponds to [p/s/cm<sup>2</sup>/sr]. T-test of JML1-CAR against No CAR  $n=5$ .  $p < 0.05$  (\*). Experiments of groups of 5 mice shown were repeated three times.

### **Supplemental Method:**

#### **Siglec-6 epitope mapping**

Each domain mapping Siglec-6 construct was expressed as a human IgG-Fc domain fusion protein by transfecting 293 Freestyle cells (ThermoFisher Scientific) with pCEP4 plasmids

containing human IgG1 Fc (99-329) fused at its C-terminus to Siglec-6 residues 27-128, 27-145, 27-235, or 27-347. Cell culture supernatants were sterile-filtered and purified via affinity chromatography using a HiTrap Protein A HP column (GE Healthcare). Proteins were 90% pure as determined by SDS PAGE.

For the domain mapping ELISA, 50 ng of each Siglec-6 construct was coated directly into individual polystyrene wells of a 96-well plate and subsequently incubated with the human Fab JML-1 or an isotype control at 1.5 ng/ $\mu$ L. Binding was detected with peroxidase-conjugated goat anti-human IgG, F(ab')<sub>2</sub> -specific secondary antibody (Jackson ImmunoResearch) and BioFX ABTS one-component HRP substrate. Signal was quantified at 405 nm using SpectraMax M5 instrument with SoftMax Pro software (Molecular Devices).

**A**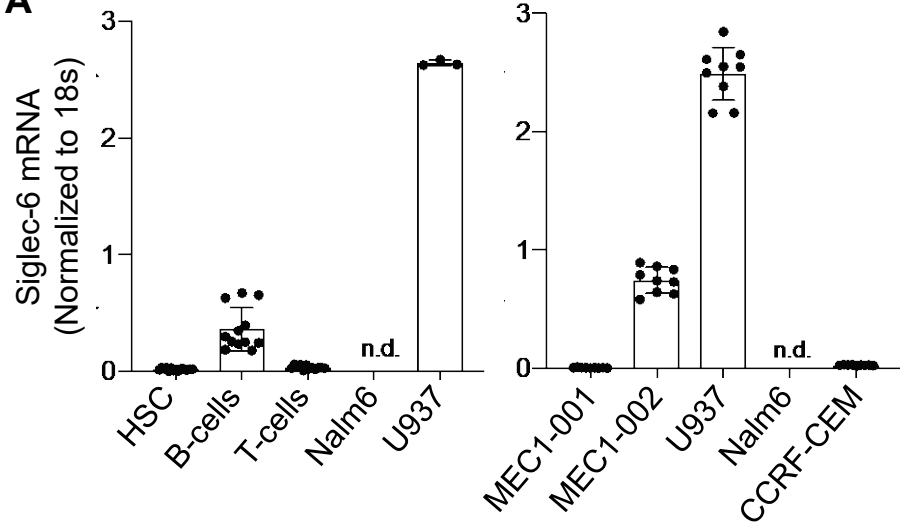**B**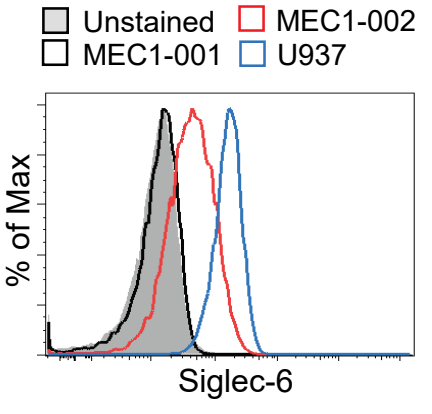**C**

% Siglec-6<sup>+</sup>B-cells

|       |      |
|-------|------|
| PBMC1 | 57   |
| PBMC2 | 37   |
| PBMC3 | 25   |
| PBMC4 | 35.6 |
| PBMC5 | 43.1 |
| PBMC6 | 31.8 |
| PBMC7 | 33   |
| PBMC8 | 13   |
| Mean  | 34.4 |
| SD    | 12.8 |

**D**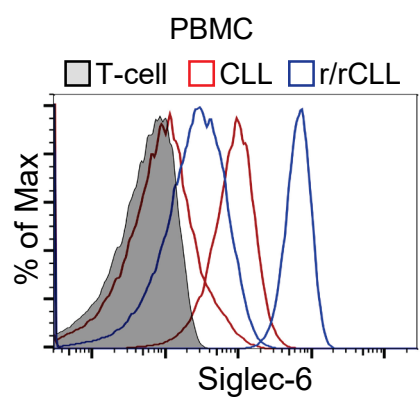

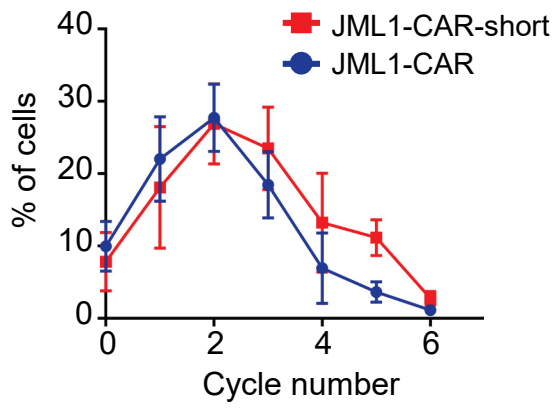

**A**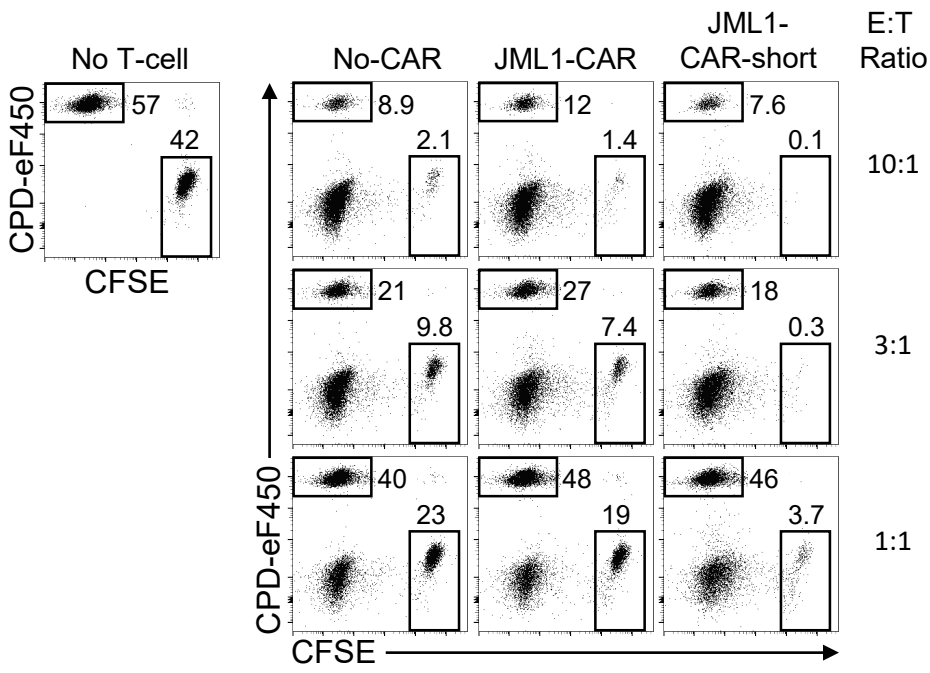**B**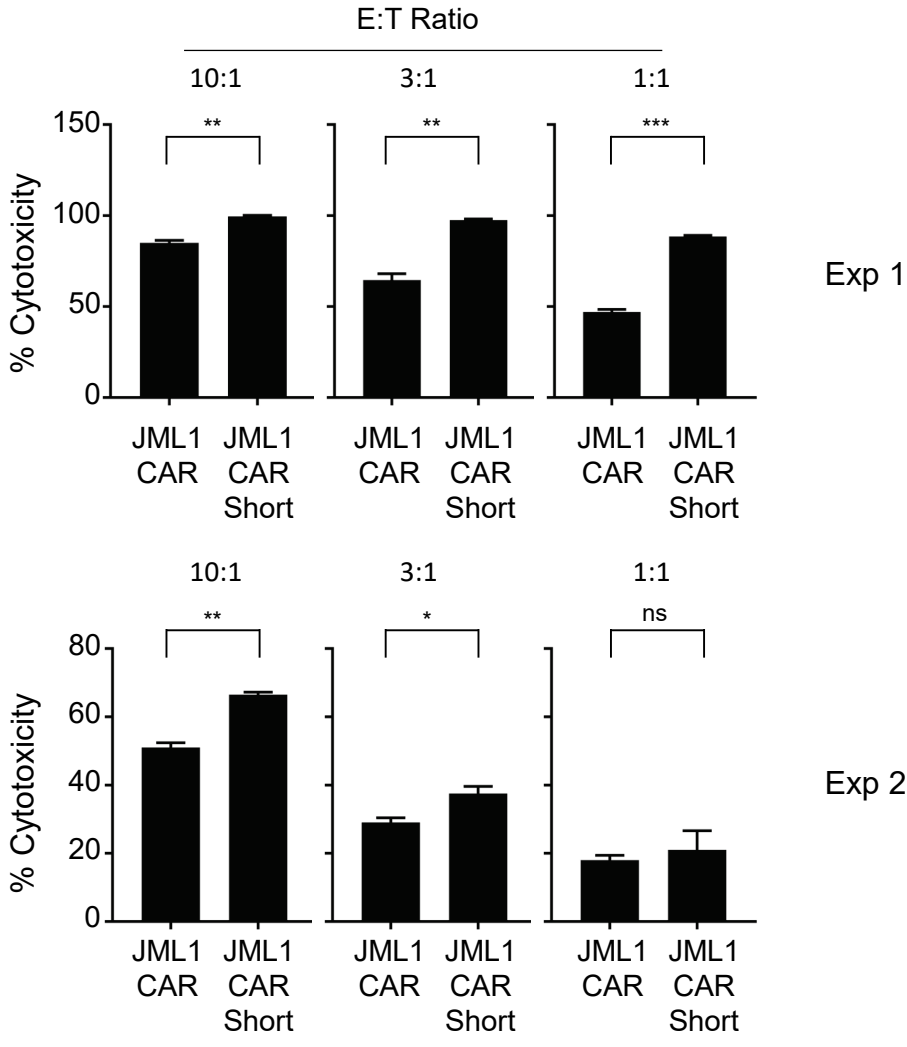

# JML-1 Fab domain mapping

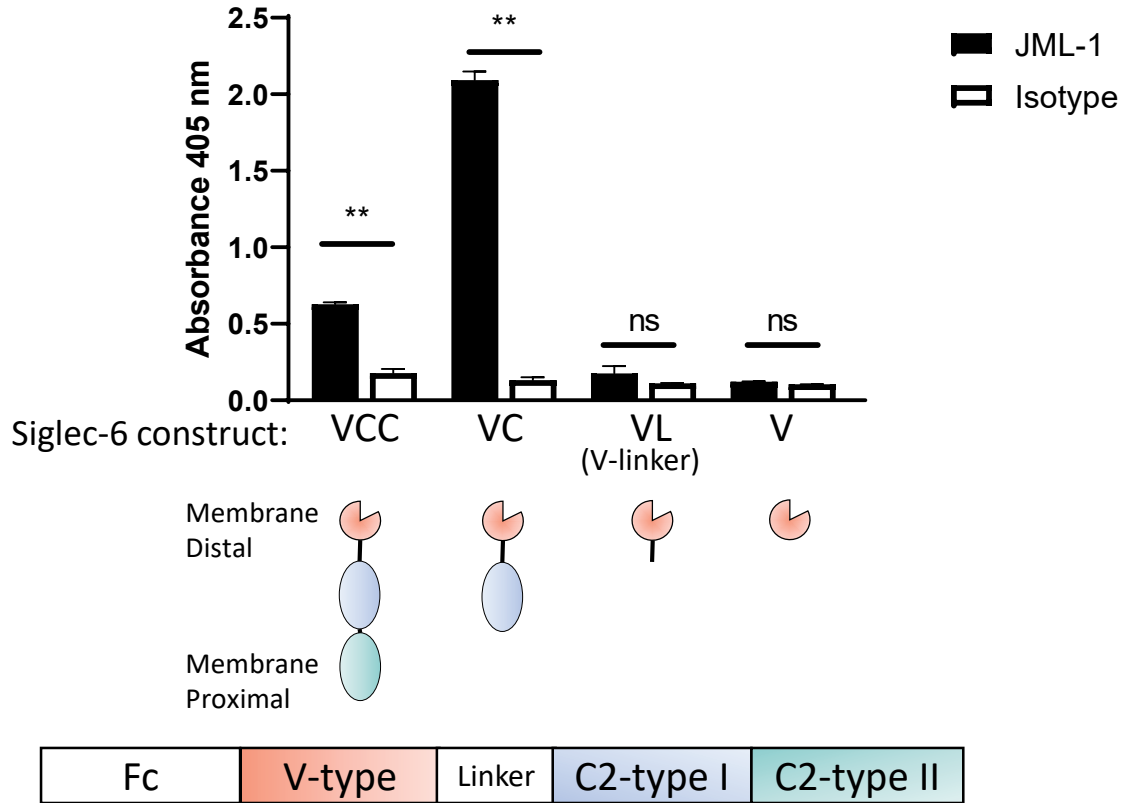

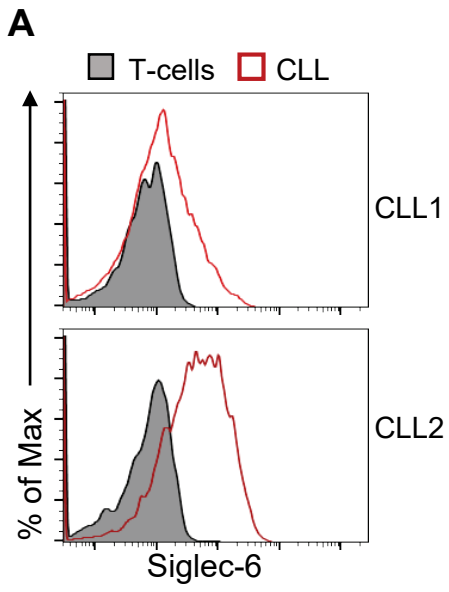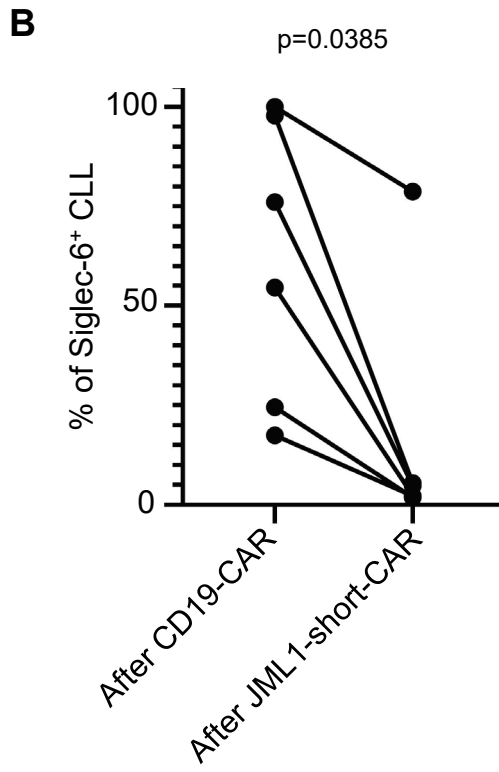



**A**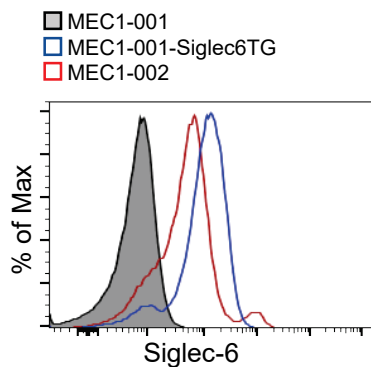**B**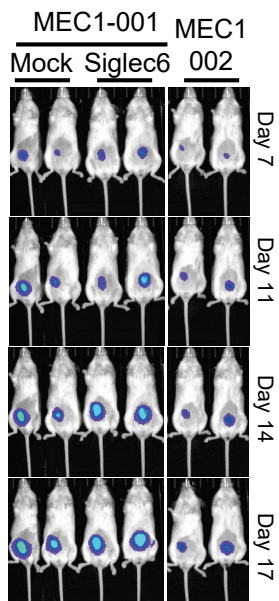**C**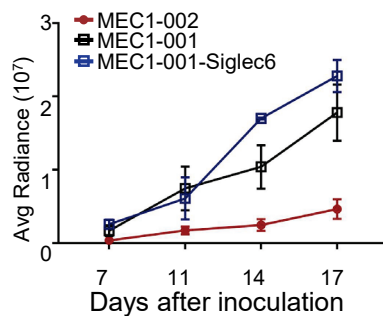**D**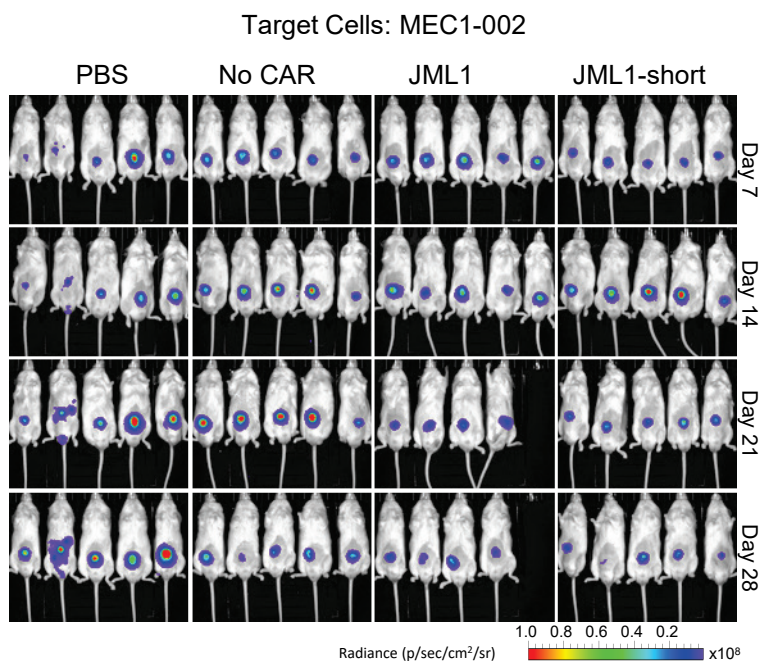**E**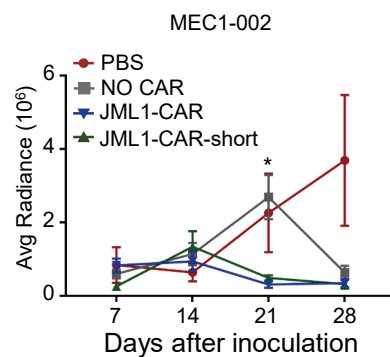

Supplement: NIHMS1670112-supplement-1.pdf [file NIHMS1670112-supplement-1.pdf]
